# Supplementary figures and images for: Does the DNA barcoding gap exist? – a case study in blue butterflies (Lepidoptera: Lycaenidae)
Source: Springer Nature journal article supplement (doi:10.1186/1742-9994-4-8), 2007-01-01

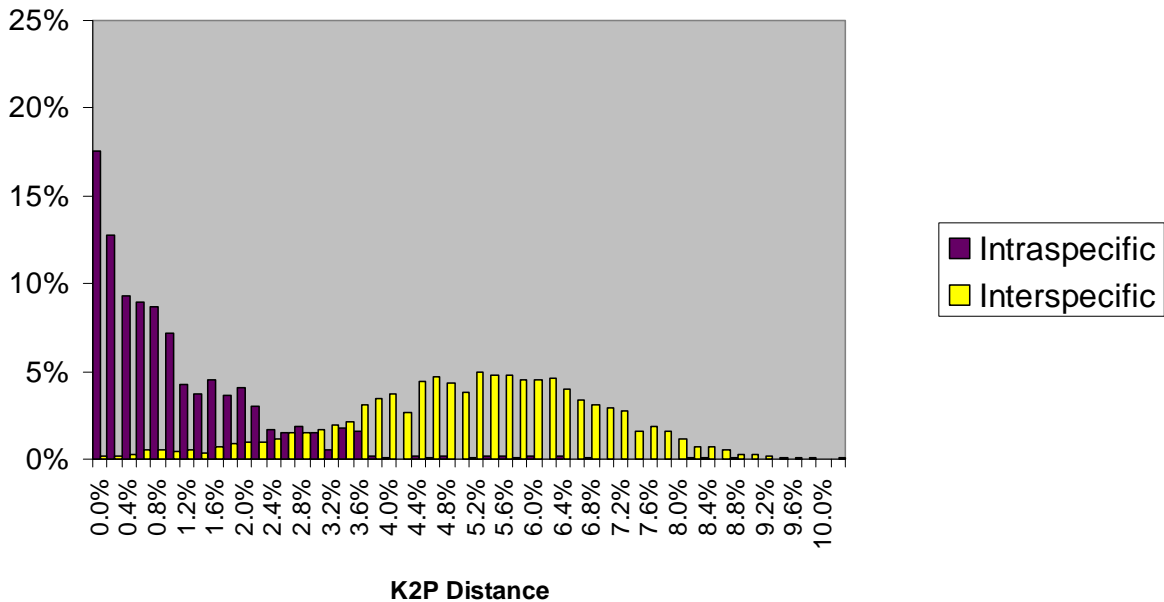

Supplement: 12983_2006_52_MOESM2_ESM.pdf [file 12983_2006_52_MOESM2_ESM.pdf]

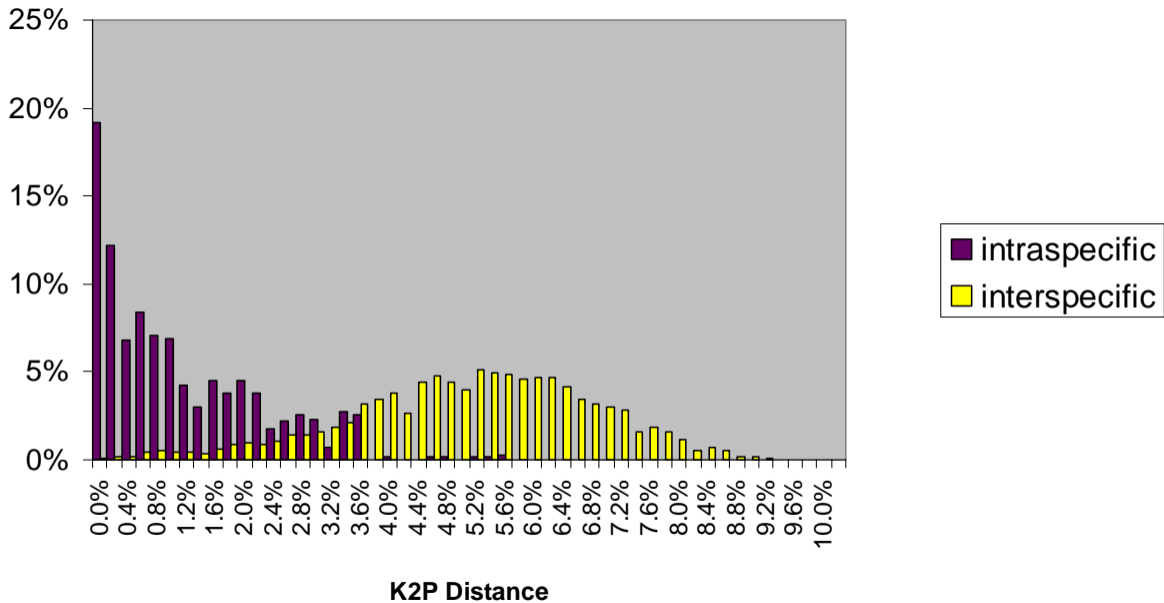

Supplement: 12983_2006_52_MOESM3_ESM.pdf [file 12983_2006_52_MOESM3_ESM.pdf]

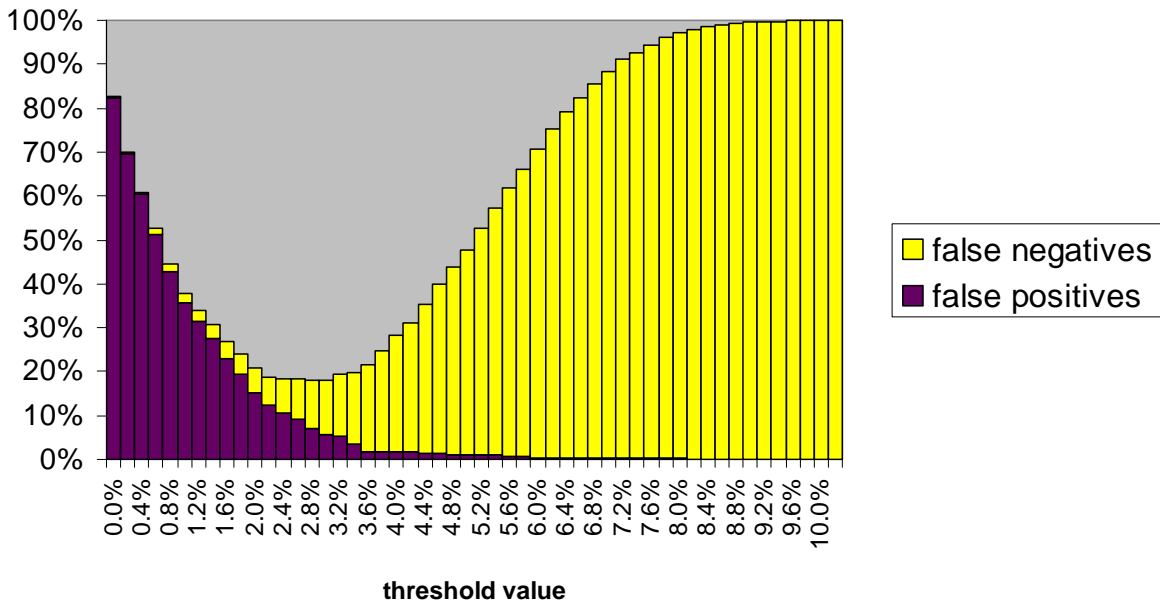

Supplement: 12983_2006_52_MOESM4_ESM.pdf [file 12983_2006_52_MOESM4_ESM.pdf]

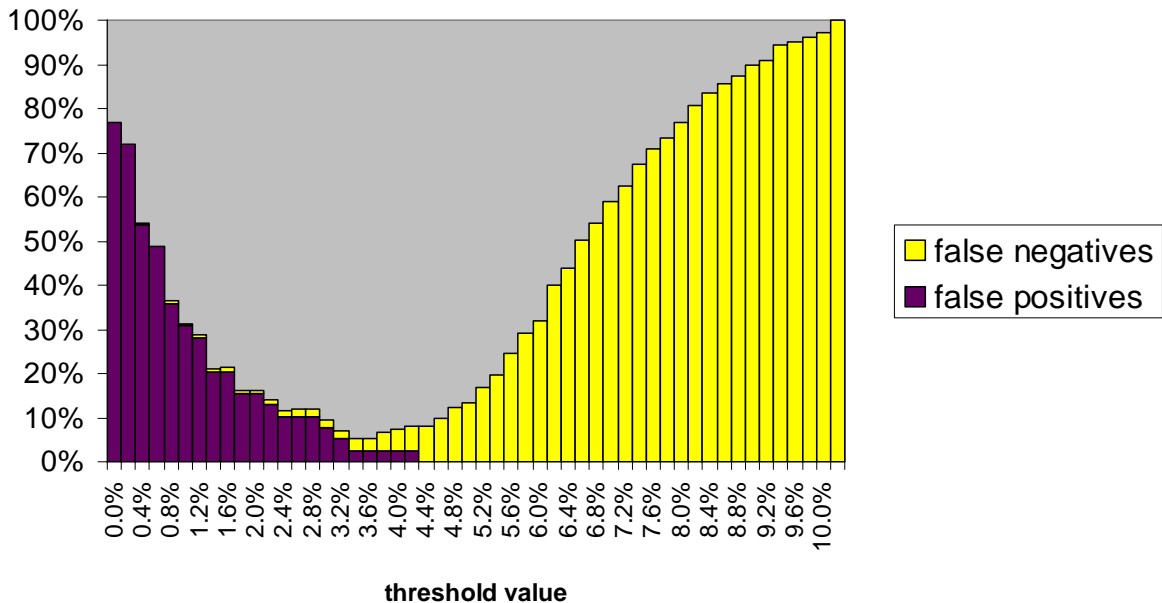

Supplement: 12983_2006_52_MOESM5_ESM.pdf [file 12983_2006_52_MOESM5_ESM.pdf]

# Minimum interspecific distances

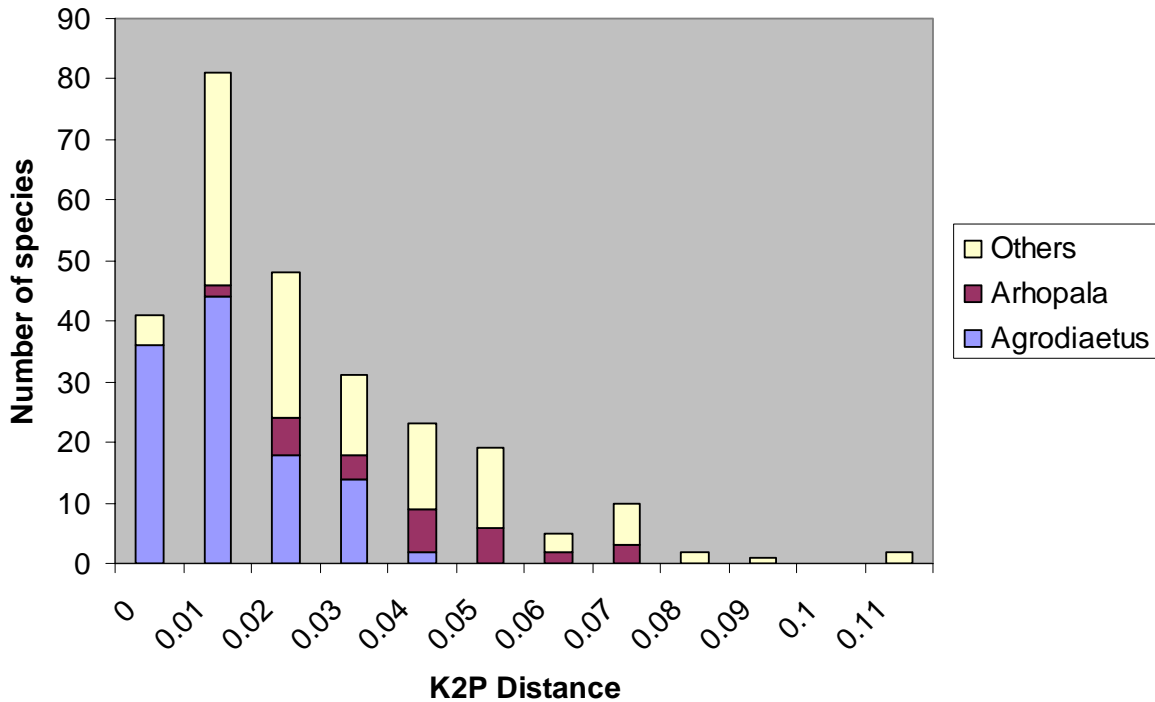

Supplement: 12983_2006_52_MOESM6_ESM.pdf [file 12983_2006_52_MOESM6_ESM.pdf]

# Sequence overlap for pairwise barcode comparisons

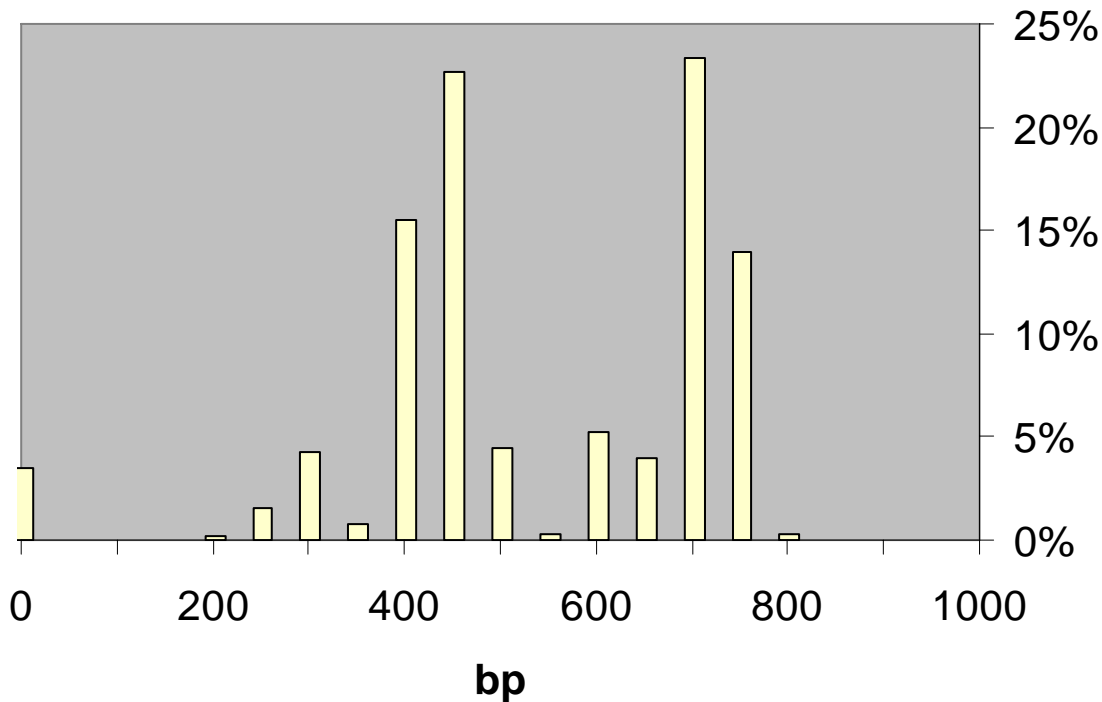

Supplement: 12983_2006_52_MOESM7_ESM.pdf [file 12983_2006_52_MOESM7_ESM.pdf]
